# Supplementary material for: Mansonella perstans microfilaremic individuals are characterized by enhanced type 2 helper T and regulatory T and B cell subsets and dampened systemic innate and adaptive immune responses
Source: PubMed Central journal article supplement (PMC5783424; doi:10.1371/journal.pntd.0006184), 2018-01-11
Supplement: pntd.0006184.s001.pdf [file pntd.0006184.s001.pdf]

**S1 Table: Characteristics of study population for the analysis of systemic cytokine and chemokine levels**

| <b>Characteristics</b>                            | <b>Mp MF+</b>                      | <b>Mp MF-</b>                            |
|---------------------------------------------------|------------------------------------|------------------------------------------|
| Total sample size (n)                             | 11                                 | 28                                       |
| Mean age (range) [years]                          | 36.5 (26-64)                       | 37.1 (10-67)                             |
| Median age (range) [years]                        | 37 (26-64)                         | 33 (10-67)                               |
| Gender [Female:Male]                              | 1:10                               | 13:15                                    |
| Health district                                   | Konye, Kumba, Tombel,              | Konye, Kumba, Tombel                     |
| Community                                         | Baduma, Matondo, Mbalangui, Mbule, | Baduma, Ediki, Matondo, Mbalangui, Mbule |
| Mean of microfilaria count (range) [MF/ml]        | 75.4 (1-364)                       | 0                                        |
| Median of microfilaria count (range) [MF/ml]      | 53 (1-364)                         | 0                                        |
| Number of Ov16-specific IgG4 positive individuals | 10 (out of 11)                     | 15 (out of 19)                           |
| Number of individuals positive for STHs           | 1 ( <i>Ascaris lumbricoides</i> )  | 0                                        |
