# Supplementary material for: Mansonella perstans microfilaremic individuals are characterized by enhanced type 2 helper T and regulatory T and B cell subsets and dampened systemic innate and adaptive immune responses
Source: PubMed Central journal article supplement (PMC5783424; doi:10.1371/journal.pntd.0006184), 2018-01-11
Supplement: pntd.0006184.s002.pdf [file pntd.0006184.s002.pdf]

**S4 Table: Characteristics of study population for the analysis of serum immunoglobulin levels**

| <b>Characteristics</b>                            | <b>Mp MF+</b>                        | <b>Mp MF-</b>                        |
|---------------------------------------------------|--------------------------------------|--------------------------------------|
| Total sample size (n)                             | 11                                   | 6                                    |
| Mean age (range) [years]                          | 36.5 (26-64)                         | 29.3 (10-38)                         |
| Median age (range) [years]                        | 37 (26-64)                           | 33 (10-38)                           |
| Gender [Female:Male]                              | 1:10                                 | 0:6                                  |
| Health district                                   | Konye, Kumba, Tombel,                | Konye, Kumba, Tombel                 |
| Community                                         | Baduma, Matondo,<br>Mbalangui, Mbule | Baduma, Matondo,<br>Mbalangui, Mbule |
| Mean of microfilaria count (range) [MF/ml]        | 75.4 (1-364)                         | 0                                    |
| Median of microfilaria count (range) [MF/ml]      | 53 (1-364)                           | 0                                    |
| Number of Ov16-specific IgG4 positive individuals | 10 (out of 11)                       | 2 (out of 3)                         |
| Number of individuals positive for STHs           | 1 ( <i>Ascaris lumbricoides</i> )    | 0                                    |
