# Supplementary material for: Mansonella perstans microfilaremic individuals are characterized by enhanced type 2 helper T and regulatory T and B cell subsets and dampened systemic innate and adaptive immune responses
Source: PubMed Central journal article supplement (PMC5783424; doi:10.1371/journal.pntd.0006184), 2018-01-11
Supplement: pntd.0006184.s003.pdf [file pntd.0006184.s003.pdf]

**S6 Table: Characteristics of study population for the *M. perstans*-specific re-stimulation assays**

| <b>Characteristics</b>                            | <b>Mp MF+</b>                                                         | <b>NEN</b>   |
|---------------------------------------------------|-----------------------------------------------------------------------|--------------|
| Total sample size (n)                             | 9                                                                     | 4            |
| Mean age (range) [years]                          | 36.8 (26-60)                                                          | 44.5 (34-55) |
| Median age (range) [years]                        | 38 (26-60)                                                            | 44.5 (34-55) |
| Gender [Female:Male]                              | 0:9                                                                   | 0:4          |
| Health district                                   | Tombel                                                                | Bonn         |
| Community                                         | Mbule                                                                 | Bonn         |
| Mean of microfilaria count (range) [MF/ml]        | 117.8 (11-364)                                                        | 0            |
| Median of microfilaria count (range) [MF/ml]      | 102 (11-364)                                                          | 0            |
| Number of Ov16-specific IgG4 positive individuals | 8 (out of 9)                                                          | 0            |
| Number of individuals positive for STHs           | 1 ( <i>Ascaris lumbricoides</i> )<br>1 ( <i>Trichuris trichiura</i> ) | 0            |
