# Supplementary material for: Mansonella perstans microfilaremic individuals are characterized by enhanced type 2 helper T and regulatory T and B cell subsets and dampened systemic innate and adaptive immune responses
Source: PubMed Central journal article supplement (PMC5783424; doi:10.1371/journal.pntd.0006184), 2018-01-11
Supplement: pntd.0006184.s004.pdf [file pntd.0006184.s004.pdf]

**S7 Table: Characteristics of study population for flow cytometry analysis**

| <b>Characteristics</b>                            | <b>Mp MF+</b>                                                         | <b>Mp MF-</b>                                        |
|---------------------------------------------------|-----------------------------------------------------------------------|------------------------------------------------------|
| Total sample size (n)                             | 11                                                                    | 10                                                   |
| Mean age (range) [years]                          | 36.9 (26-60)                                                          | 30.9 (23-43)                                         |
| Median age (range) [years]                        | 38 (26-60)                                                            | 28.5 (23-43)                                         |
| Gender [Female:Male]                              | 0:11                                                                  | 0:10                                                 |
| Health district                                   | Tombel                                                                | Buea, Tombel                                         |
| Community                                         | Mbule                                                                 | Bomaka, Mbule, Mile-14, Minicoknette, Molyko, Sampit |
| Mean of microfilaria count (range) [MF/ml]        | 207.9 (11-745)                                                        | 0                                                    |
| Median of microfilaria count (range) [MF/ml]      | 109 (11-745)                                                          | 0                                                    |
| Number of Ov16-specific IgG4 positive individuals | 8 (out of 10)                                                         | 0 (out of 9)                                         |
| Number of individuals positive for STHs           | 2 ( <i>Ascaris lumbricoides</i> )<br>1 ( <i>Trichuris trichiura</i> ) | 0                                                    |
